# Supplementary material for: A novel domain within the CIL regulates egress of IFITM3 from the Golgi and reveals a regulatory role of IFITM3 on the secretory pathway
Source: Life Sci Alliance. 2022 Apr 8;5(7):e202101174. doi: 10.26508/lsa.202101174 (PMC8994042; doi:10.26508/lsa.202101174)
Supplement: Supplementary file 2 [file LSA-2021-01174_SdataF1_F2_F3_F4_F5_F6_F7.xlsx]

## Sheet: Fig 1d
	Scoring examples												The scoring procedure was validated for a small set of cells by quantifying the asymmetrical distribution of mEm.VSV-G (method that was instead used for quantification in Fig 3b)
													Perinuclear accumulation=asymmetrical distribution of mEm.VSV-G
													Example of asymetrical distribution
																							AVG fluorescence			Normalized percentages of mEm.VSV-G in Left part of the cells
																							Left part of the cell	Right part of the cell
																							74.8547	14.1327		84.1184
													Example of symmetrical distribution
			Perinuclear accumulation of VSVg-GFP in IFITM3 positive cells (except in control with no IFITM3)
																							AVG fluorescence			Normalized percentages of mEm.VSV-G in Left part of the cells
																							Left part of the cell	Right part of the cell
			Number of cells per picture				Percentage cells with phenotype per picture
																							12.6441	11.1481		53.1437
			Perinuclear	Non-Perinuclear			Perinuclear	Non-Perinuclear
	CTL	Picture n1	0	3			0	100
		Picture n2	2	3			40	60
		Picture n3	2	1			66.6667	33.3333
		Picture n4	0	3			0	100
		Picture n5	0	4			0	100
		Picture n6	1	7			12.5	87.5
		Picture n7	1	10			9.09091	90.9091
		Picture n8	0	7			0	100
		Picture n9	0	9			0	100
		Tot cells scored	53			AVG	14.2508	85.7492
	IFITM3 WT	Picture n1	0	3			0	100
		Picture n2	1	3			25	75
		Picture n3	1	0			100	0
		Picture n4	2	2			50	50
		Picture n5	2	0			100	0
		Picture n6	0	3			0	100
		Picture n7	0	6			0	100
		Picture n8	2	4			33.3333	66.6667
		Picture n9	3	4			42.8571	57.1429
		Picture n10	1	3			25	75
		Picture n11	1	14			6.66667	93.3333
		Picture n12	1	6			14.2857	85.7143
		Picture n13	1	15			6.25	93.75
		Picture n14	0	8			0	100
		Picture n15	0	7			0	100
		Picture n16	0	8			0	100
		Picture n17	0	8			0	100
		Tot cells scored	109			AVG	23.729	76.271
	85-90	Picture n1	5	1			83.3333	16.6667
		Picture n2	3	0			100	0
		Picture n3	2	1			66.6667	33.3333
		Picture n4	3	2			60	40
		Picture n5	3	0			100	0
		Picture n6	4	0			100	0
		Picture n7	2	0			100	0
		Picture n8	2	0			100	0
		Picture n9	6	0			100	0
		Picture n10	3	0			100	0
		Picture n11	3	0			100	0
		Picture n12	2	0			100	0
		Picture n13	5	3			62.5	37.5
		Picture n14	3	3			50	50
		Picture n15	7	2			77.7778	22.2222
		Picture n16	4	2			66.6667	33.3333
		Picture n17	0	4			0	100
		Picture n18	5	1			83.3333	16.6667
		Picture n19	4	2			66.6667	33.3333
		Picture n20	5	1			83.3333	16.6667
		Picture n21	1	2			33.3333	66.6667
		Picture n22	7	0			100	0
		Picture n23	3	2			60	40
		Tot cells scored	108			AVG	77.9831	22.0169
							adjusted p value
				One-way Anova, Tukey's multiple comparison test: CTL vs 85-90 Perinuclear			<0,0001
				One-way Anova, Tukey's multiple comparison test: WT IFITM3 vs 85-90 Perinuclear			<0,0001
				One-way Anova, Tukey's multiple comparison test: CTL vs WT IFITM3 Perinuclear			0.6979

## Sheet: Fig 1e
EndoH Sensitivity of VSV-G in presence of WT and mutant IFITM3
		WT-IFITM3				85-90 -IFITM3				CTL
		Total VSVg-GFP	EndoHResistant	EndoHSensitive		Total VSVg-GFP	EndoHResistant	EndoHSensitive		Total VSVg-GFP	EndoHResistant	EndoHSensitive
Densitometry values	Exp 1	56639	39264	17375		60747	21816	38931		56043	51347	4696
	Exp 2	10323	5911	4412		10233	3865	6368		26904	21807	5097
	Exp 3	26748	19199	7549		15874	9526	6348		9023	6355	2668
	Exp 4	14248	10320	3928		13523	8295	5228		7343	6009	1334
	Exp 5	24547	14299	10248		24096	11259	12837		21740	13641	8099
Above values Transformed in percentages	Exp 1		69.3233	30.6767			35.9129	64.0871			91.6207	8.37928
	Exp 2		57.2605	42.7395			37.77	62.23			81.0549	18.9451
	Exp 3		71.7773	28.2227			60.0101	39.9899			70.4311	29.5689
	Exp 4		72.4312	27.5688			61.3399	38.6601			81.833	18.167
	Exp 5		58.2515	41.7485			46.7256	53.2744			62.7461	37.2539
	AVG		65.8088	34.1912			48.3517	51.6483			77.5372	22.4628
			Endo H sensitive proportion 85-90 vs CTL
One-way Anova			0.0021

## Sheet: Fig 2a
	Scoring examples
	Binary scoring: normal or inflated
	Golgi appearence in IFITM3 positive cells
			Number of cells per picture				Percentage cells with phenotype per picture
			Normal	Inflated			Normal	Inflated
	IFITM3 WT	Picture n1	10	0			100	0
		Picture n2	5	1			83.3333	16.6667
		Picture n3	5	0			100	0
		Picture n4	5	0			100	0
		Picture n5	5	1			83.3333	16.6667
		Picture n6	1	1			50	50
		Picture n7	3	0			100	0
		Picture n8	3	0			100	0
		Picture n9	3	0			100	0
		Picture n10	4	1			80	20
		Picture n11	2	0			100	0
		Picture n12	1	1			50	50
		Picture n13	3	0			100	0
		Picture n14	9	2			81.8182	18.1818
		Picture n15	6	1			85.7143	14.2857
		Picture n16	5	1			83.3333	16.6667
		Picture n17	12	2			85.7143	14.2857
		Picture n18	12	1			92.3077	7.69231
		Picture n19	4	2			66.6667	33.3333
		Tot cell scored	112			AVG	86.4327	13.5673
	85-90	Picture n1	2	8			20	80
		Picture n2	1	4			20	80
		Picture n3	2	8			20	80
		Picture n4	3	4			42.8571	57.1429
		Picture n5	3	3			50	50
		Picture n6	2	5			28.5714	71.4286
		Picture n7	2	4			33.3333	66.6667
		Picture n8	0	5			0	100
		Picture n9	1	6			14.2857	85.7143
		Picture n10	3	3			50	50
		Picture n11	4	1			80	20
		Picture n12	0	5			0	100
		Picture n13	4	1			80	20
		Picture n14	3	3			50	50
		Picture n15	2	4			33.3333	66.6667
		Picture n16	0	4			0	100
		Tot cell scored	100			AVG	32.6488	67.3512
							p value
				Student t test unpaired, two-tailed: WT IFITM3 vs 85-90; proportion cells with inflated Golgi			8.32732e-09

## Sheet: Fig 3
		Cell number	Location and Signal		Ratio Golgi/Cytoplasm			Cell number	Location and Signal		Ratio Golgi/Cytoplasm			Cell number	Location and Signal		Ratio Golgi/Cytoplasm					Cell number	Location and Signal		Ratio Golgi/Cytoplasm				Cell number	Location and Signal		Ratio Golgi/Cytoplasm				Cell number	Location and Signal		Ratio Golgi/Cytoplasm
	wt ifitm3-golgi 6h	1	Golgi	214.864			wt ifitm3-golgi12h	1	Golgi	152.688			wt ifitm3-golgi24h	1	Golgi	107.687					85-90 ifitm3-golgi 6h	1	Golgi	134.612				85-90 ifitm3-golgi 12h	1	Golgi	148.591				85-90 ifitm3-golgi 24h	1	Golgi	157.887
			Cyto	48.8161					Cyto	40.5491					Cyto	68.7374							Cyto	20.266						Cyto	47.9413						Cyto	25.875
			Ratio	4.4015	4.4015				Ratio	3.7655	3.7655				Ratio	1.5666	1.5666						Ratio	6.6423	6.6423					Ratio	3.0994	3.0994					Ratio	6.1019	6.1019
		2	Golgi	105.91				2	Golgi	103.013				2	Golgi	110.346						2	Golgi	117.569					2	Golgi	115.219					2	Golgi	214.63
			Cyto	29.1631					Cyto	22.4192					Cyto	76.4301							Cyto	27.0999						Cyto	31.7108						Cyto	78.2427
			Ratio	3.6317	3.6317				Ratio	4.5949	4.5949				Ratio	1.4438	1.4438						Ratio	4.3384	4.3384					Ratio	3.6334	3.6334					Ratio	2.7431	2.7431
		3	Golgi	100.949				3	Golgi	126.24				3	Golgi	21.58						3	Golgi	130.487					3	Golgi	117.319					3	Golgi	202.607
			Cyto	16.1082					Cyto	49.6764					Cyto	29.8233							Cyto	30.9662						Cyto	19.4287						Cyto	79.6624
			Ratio	6.2669	6.2669				Ratio	2.5412	2.5412				Ratio	0.7236	0.7236						Ratio	4.2138	4.2138					Ratio	6.0384	6.0384					Ratio	2.5433	2.5433
		4	Golgi	187.219				4	Golgi	65.8064				4	Golgi	121.043						4	Golgi	92.5274					4	Golgi	98.1375					4	Golgi	213.99
			Cyto	26.2565					Cyto	21.2342					Cyto	86.9867							Cyto	24.0084						Cyto	16.4713						Cyto	66.9785
			Ratio	7.1304	7.1304				Ratio	3.0991	3.0991				Ratio	1.3915	1.3915						Ratio	3.854	3.854					Ratio	5.9581	5.9581					Ratio	3.1949	3.1949
		5	Golgi	69.2987				5	Golgi	183.673				5	Golgi	238.829						5	Golgi	81.0573					5	Golgi	134.702					5	Golgi	197.168
			Cyto	10.1027					Cyto	19.775					Cyto	110.532							Cyto	25.2671						Cyto	28.3978						Cyto	31.1924
			Ratio	6.8594	6.8594				Ratio	9.2881	9.2881				Ratio	2.1607	2.1607						Ratio	3.208	3.208					Ratio	4.7434	4.7434					Ratio	6.321	6.321
		6	Golgi	213.498				6	Golgi	134.708				6	Golgi	144.263						6	Golgi	86.9399					6	Golgi	148.329					6	Golgi	240.543
			Cyto	28.5264					Cyto	40.7408					Cyto	121.096							Cyto	15.3403						Cyto	28.7793						Cyto	57.1153
			Ratio	7.4842	7.4842				Ratio	3.3065	3.3065				Ratio	1.1913	1.1913						Ratio	5.6674	5.6674					Ratio	5.154	5.154					Ratio	4.2115	4.2115
		7	Golgi	82.7963				7	Golgi	38.2143				7	Golgi	239.333						7	Golgi	161.022					7	Golgi	116.763					7	Golgi	238.691
			Cyto	11.2446					Cyto	26.3032					Cyto	77.0684							Cyto	32.1007						Cyto	26.4914						Cyto	32.2053
			Ratio	7.3632	7.3632				Ratio	1.4528	1.4528				Ratio	3.1055	3.1055						Ratio	5.0162	5.0162					Ratio	4.4076	4.4076					Ratio	7.4115	7.4115
		8	Golgi	185.674				8	Golgi	152.29				8	Golgi	230.169						8	Golgi	126.552					8	Golgi	58.5419					8	Golgi	224.503
			Cyto	34.811					Cyto	33.0761					Cyto	93.89							Cyto	22.6641						Cyto	14.9457						Cyto	75.2831
			Ratio	5.3338	5.3338				Ratio	4.6042	4.6042				Ratio	2.4515	2.4515						Ratio	5.5838	5.5838					Ratio	3.917	3.917					Ratio	2.9821	2.9821
		9	Golgi	48.8873				9	Golgi	131.036				9	Golgi	166.155						9	Golgi	148.895					9	Golgi	109.81					9	Golgi	169.951
			Cyto	8.3379					Cyto	28.5323					Cyto	79.8804							Cyto	24.9235						Cyto	18.1241						Cyto	49.2207
			Ratio	5.8633	5.8633				Ratio	4.5925	4.5925				Ratio	2.08	2.08						Ratio	5.9741	5.9741					Ratio	6.0588	6.0588					Ratio	3.4528	3.4528
		10	Golgi	234.652				10	Golgi	144.09				10	Golgi	137.196						10	Golgi	149.179					10	Golgi	77.502					10	Golgi	157.29
			Cyto	77.7849					Cyto	39.2264					Cyto	72.9269							Cyto	26.208						Cyto	21.038						Cyto	29.3037
			Ratio	3.0167	3.0167				Ratio	3.6733	3.6733				Ratio	1.8813	1.8813						Ratio	5.6921	5.6921					Ratio	3.6839	3.6839					Ratio	5.3676	5.3676
		11	Golgi	186.652				11	Golgi	152.987				11	Golgi	93.9147						11	Golgi	146.035					11	Golgi	66.5852					11	Golgi	187.359
			Cyto	33.7723					Cyto	27.8246					Cyto	48.3031							Cyto	14.0771						Cyto	22.4086						Cyto	60.1161
			Ratio	5.5268	5.5268				Ratio	5.4983	5.4983				Ratio	1.9443	1.9443						Ratio	10.3739	10.3739					Ratio	2.9714	2.9714					Ratio	3.1166	3.1166
		12	Golgi	177.559				12	Golgi	118.84				12	Golgi	80.0809						12	Golgi	213.483					12	Golgi	132.819					12	Golgi	130.109
			Cyto	53.472					Cyto	54.259					Cyto	67.287							Cyto	41.1154						Cyto	21.2304						Cyto	35.8482
			Ratio	3.3206	3.3206				Ratio	2.1902	2.1902				Ratio	1.1901	1.1901						Ratio	5.1923	5.1923					Ratio	6.256	6.256					Ratio	3.6294	3.6294
		13	Golgi	177.725				13	Golgi	115.33				13	Golgi	113.688						13	Golgi	167.382					13	Golgi	80.76					13	Golgi	115.433
			Cyto	43.179					Cyto	28.3903					Cyto	60.9477							Cyto	39.8921						Cyto	19.0498						Cyto	30.8862
			Ratio	4.116	4.116				Ratio	4.0623	4.0623				Ratio	1.8653	1.8653						Ratio	4.1959	4.1959					Ratio	4.2394	4.2394					Ratio	3.7374	3.7374
		14	Golgi	135.929				14	Golgi	145.995				14	Golgi	163.201						14	Golgi	64.5358					14	Golgi	125.935					14	Golgi	178.46
			Cyto	22.1847					Cyto	44.7651					Cyto	69.5831							Cyto	12.0675						Cyto	20.6226						Cyto	16.8411
			Ratio	6.1271	6.1271				Ratio	3.2614	3.2614				Ratio	2.3454	2.3454						Ratio	5.3479	5.3479					Ratio	6.1067	6.1067					Ratio	10.5967	10.5967
		15	Golgi	135.191				15	Golgi	133.279				15	Golgi	186.813						15	Golgi	122.94					15	Golgi	82.98					15	Golgi	120.326
			Cyto	23.2467					Cyto	31.7648					Cyto	88.551							Cyto	22.7047						Cyto	12.6459						Cyto	24.3718
			Ratio	5.8155	5.8155				Ratio	4.1958	4.1958				Ratio	2.1097	2.1097						Ratio	5.4147	5.4147					Ratio	6.5618	6.5618					Ratio	4.9371	4.9371
		16	Golgi	90.6503				16	Golgi	127.038				16	Golgi	105.313						16	Golgi	141.32					16	Golgi	89.4383					16	Golgi	101.139
			Cyto	18.5218					Cyto	45.7931					Cyto	75.644							Cyto	26.6186						Cyto	14.215						Cyto	27.6188
			Ratio	4.8943	4.8943				Ratio	2.7742	2.7742				Ratio	1.3922	1.3922						Ratio	5.3091	5.3091					Ratio	6.2918	6.2918					Ratio	3.6619	3.6619
		17	Golgi	161.818				17	Golgi	129.792				17	Golgi	151.161						17	Golgi	78.5333					17	Golgi	140.91					17	Golgi	224.002
			Cyto	23.5956					Cyto	44.7852					Cyto	69.9174							Cyto	17.1817						Cyto	26.1279						Cyto	49.3909
			Ratio	6.858	6.858				Ratio	2.8981	2.8981				Ratio	2.162	2.162						Ratio	4.5707	4.5707					Ratio	5.3931	5.3931					Ratio	4.5353	4.5353
		18	Golgi	191.802				18	Golgi	163.413				18	Golgi	129.789						18	Golgi	64.1163					18	Golgi	95.8081					18	Golgi	237.908
			Cyto	45.8022					Cyto	35.0685					Cyto	60.45							Cyto	14.05						Cyto	31.4647						Cyto	49.6052
			Ratio	4.1876	4.1876				Ratio	4.6598	4.6598				Ratio	2.147	2.147						Ratio	4.5634	4.5634					Ratio	3.0449	3.0449					Ratio	4.796	4.796
		19	Golgi	222.827				19	Golgi	123.878				19	Golgi	85.25						19	Golgi	104.742					19	Golgi	82.98					19	Golgi	237.908
			Cyto	43.1176					Cyto	26.341					Cyto	69.7997							Cyto	30.6812						Cyto	13.9791						Cyto	49.6052
			Ratio	5.1679	5.1679				Ratio	4.7029	4.7029				Ratio	1.2214	1.2214						Ratio	3.4139	3.4139					Ratio	5.936	5.936					Ratio	4.796	4.796
		20	Golgi	164.868				20	Golgi	85.0786				20	Golgi	28.5319						20	Golgi	165.274					20	Golgi	91.581					20	Golgi	190.493
			Cyto	7.5764					Cyto	26.6012					Cyto	44.4069							Cyto	39.8846						Cyto	12.9255						Cyto	54.4959
			Ratio	21.7608	21.7608				Ratio	3.1983	3.1983				Ratio	0.6425	0.6425						Ratio	4.1438	4.1438					Ratio	7.0853	7.0853					Ratio	3.4955	3.4955
		21	Golgi	51.9086				21	Golgi	102.177				21	Golgi	78.7188						21	Golgi	153.015					21	Golgi	69.3888					21	Golgi	190.991
			Cyto	9.0246					Cyto	16.3065					Cyto	45.7337							Cyto	14.243						Cyto	11.1172						Cyto	57.2261
			Ratio	5.7519	5.7519				Ratio	6.266	6.266				Ratio	1.7212	1.7212						Ratio	10.7432	10.7432					Ratio	6.2416	6.2416					Ratio	3.3375	3.3375
		22	Golgi	214.864				22	Golgi	96.7992				22	Golgi	112.839						22	Golgi	79.2339					22	Golgi	211.532					22	Golgi	244.765
			Cyto	50.2838					Cyto	27.7256					Cyto	56.3568							Cyto	16.5764						Cyto	59.4975						Cyto	79.4856
			Ratio	4.273	4.273				Ratio	3.4913	3.4913				Ratio	2.0022	2.0022						Ratio	4.7799	4.7799					Ratio	3.5553	3.5553					Ratio	3.0794	3.0794
		23	Golgi	105.085				23	Golgi	140.185				23	Golgi	125.436						23	Golgi	51.4583					23	Golgi	112.284					23	Golgi	222.917
			Cyto	20.3158					Cyto	38.7993					Cyto	41.1127							Cyto	8.8212						Cyto	26.5253						Cyto	45.7875
			Ratio	5.1726	5.1726				Ratio	3.6131	3.6131				Ratio	3.051	3.051						Ratio	5.8335	5.8335					Ratio	4.2331	4.2331					Ratio	4.8685	4.8685
		24	Golgi	100.949				24	Golgi	74.6864				24	Golgi	228.189						24	Golgi	83.8214					24	Golgi	132.947					24	Golgi	181.862
			Cyto	12.8157					Cyto	17.968					Cyto	78.5081							Cyto	12.7643						Cyto	20.427						Cyto	60.7533
			Ratio	7.877	7.877				Ratio	4.1566	4.1566				Ratio	2.9066	2.9066						Ratio	6.5669	6.5669					Ratio	6.5084	6.5084					Ratio	2.9934	2.9934
		25	Golgi	173.399				25	Golgi	147.486				25	Golgi	115.454						25	Golgi	104.244					25	Golgi	161.038					25	Golgi	239.888
			Cyto	23.1378					Cyto	29.8916					Cyto	80.1226							Cyto	17.9657						Cyto	40.7269						Cyto	90.2738
			Ratio	7.4942	7.4942				Ratio	4.934	4.934				Ratio	1.441	1.441						Ratio	5.8024	5.8024					Ratio	3.9541	3.9541					Ratio	2.6573	2.6573
		26	Golgi	185.674				26	Golgi	134.078				26	Golgi	131.256						26	Golgi	181.963					26	Golgi	195.929					26	Golgi	238.022
			Cyto	41.4043					Cyto	26.8543					Cyto	49.3825							Cyto	28.3759						Cyto	25.339						Cyto	87.148
			Ratio	4.4844	4.4844				Ratio	4.9928	4.9928				Ratio	2.6579	2.6579						Ratio	6.4126	6.4126					Ratio	7.7323	7.7323					Ratio	2.7312	2.7312
		27	Golgi	49.3632				27	Golgi	33.6881				27	Golgi	101.982						27	Golgi	140.246					27	Golgi	174.242					27	Golgi	243.511
			Cyto	9.2859					Cyto	18.2145					Cyto	41.9527							Cyto	20.3284						Cyto	53.5829						Cyto	48.0809
			Ratio	5.3159	5.3159				Ratio	1.8495	1.8495				Ratio	2.4309	2.4309						Ratio	6.899	6.899					Ratio	3.2518	3.2518					Ratio	5.0646	5.0646
		28	Golgi	234.652				28	Golgi	108.711				28	Golgi	46.542						28	Golgi	122.401					28	Golgi	145.37					28	Golgi	195.468
			Cyto	58.0219					Cyto	15.4036					Cyto	25.0493							Cyto	24.5076						Cyto	34.2698						Cyto	67.5698
			Ratio	4.0442	4.0442				Ratio	7.0575	7.0575				Ratio	1.858	1.858						Ratio	4.9944	4.9944					Ratio	4.2419	4.2419					Ratio	2.8928	2.8928
		29	Golgi	182.521				29	Golgi	98.5326				29	Golgi	198.472						29	Golgi	195.08					29	Golgi	130.784					29	Golgi	137.563
			Cyto	27.6677					Cyto	15.1757					Cyto	58.8992							Cyto	52.0714						Cyto	22.5217						Cyto	34.398
			Ratio	6.5969	6.5969				Ratio	6.4928	6.4928				Ratio	3.3697	3.3697						Ratio	3.7464	3.7464					Ratio	5.807	5.807					Ratio	3.9991	3.9991
		30	Golgi	177.559				30	Golgi	49.5217				30	Golgi	116.012						30	Golgi	89.2835					30	Golgi	207.191					30	Golgi	146.65
			Cyto	44.214					Cyto	55.6066					Cyto	56.0373							Cyto	22.2724						Cyto	52.7634						Cyto	23.5775
			Ratio	4.0159	4.0159				Ratio	0.8906	0.8906				Ratio	2.0703	2.0703						Ratio	4.0087	4.0087					Ratio	3.9268	3.9268					Ratio	6.2199	6.2199
		31	Golgi	136.789				31	Golgi	120.238				31	Golgi	90.3468						31	Golgi	208.221					31	Golgi	180.728					31	Golgi	72.418
			Cyto	18.9311					Cyto	28.9927					Cyto	24.6259							Cyto	45.469						Cyto	28.2418						Cyto	24.7818
			Ratio	7.2256	7.2256				Ratio	4.1472	4.1472				Ratio	3.6688	3.6688						Ratio	4.5794	4.5794					Ratio	6.3993	6.3993					Ratio	2.9222	2.9222
		32	Golgi	136.862				32	Golgi	162.583				32	Golgi	92.5525						32	Golgi	209.502					32	Golgi	127.525					32	Golgi	95.2439
			Cyto	16.6476					Cyto	56.9256					Cyto	34.5291							Cyto	23.1155						Cyto	16.1471						Cyto	32.6534
			Ratio	8.2212	8.2212				Ratio	2.8561	2.8561				Ratio	2.6804	2.6804						Ratio	9.0633	9.0633					Ratio	7.8977	7.8977					Ratio	2.9168	2.9168
		33	Golgi	89.31				33	Golgi	99.8178				33	Golgi	81.3148						33	Golgi	239.213					33	Golgi	195.363					33	Golgi	96.8413
			Cyto	16.5427					Cyto	18.6805					Cyto	22.3318							Cyto	43.6136						Cyto	37.0772						Cyto	25.4008
			Ratio	5.3988	5.3988				Ratio	5.3434	5.3434				Ratio	3.6412	3.6412						Ratio	5.4848	5.4848					Ratio	5.2691	5.2691					Ratio	3.8125	3.8125
		34	Golgi	144.97				34	Golgi	126.3				34	Golgi	63.197						34	Golgi	217.251					34	Golgi	155.364					34	Golgi	46.7797
			Cyto	20.825					Cyto	26.0059					Cyto	20.2232							Cyto	34.2871						Cyto	28.0883						Cyto	11.2568
			Ratio	6.9614	6.9614				Ratio	4.8566	4.8566				Ratio	3.125	3.125						Ratio	6.3362	6.3362					Ratio	5.5313	5.5313					Ratio	4.1557	4.1557
		35	Golgi	161.818				35	Golgi	98.1343				35	Golgi	35.281						35	Golgi	150.152					35	Golgi	118.061					35	Golgi	69.7377
			Cyto	23.1073					Cyto	23.0982					Cyto	14.5229							Cyto	23.2638						Cyto	36.6491						Cyto	18.2692
			Ratio	7.0029	7.0029				Ratio	4.2486	4.2486				Ratio	2.4293	2.4293						Ratio	6.4543	6.4543					Ratio	3.2214	3.2214					Ratio	3.8172	3.8172
		36	Golgi	191.802				36	Golgi	154.84				36	Golgi	24.122						36	Golgi	105.105					36	Golgi	99.1474					36	Golgi	83.5289
			Cyto	42.8982					Cyto	24.2822					Cyto	16.891							Cyto	18.3785						Cyto	32.7953						Cyto	20.6216
			Ratio	4.4711	4.4711				Ratio	6.3767	6.3767				Ratio	1.4281	1.4281						Ratio	5.7189	5.7189					Ratio	3.0232	3.0232					Ratio	4.0506	4.0506
		37	Golgi	222.827				37	Golgi	161.737				37	Golgi	34.8727						37	Golgi	152.719					37	Golgi	120.47					37	Golgi	78.7632
			Cyto	38.2572					Cyto	30.9713					Cyto	22.9362							Cyto	29.8188						Cyto	22.5621						Cyto	23.2682
			Ratio	5.8244	5.8244				Ratio	5.2222	5.2222				Ratio	1.5204	1.5204						Ratio	5.1216	5.1216					Ratio	5.3395	5.3395					Ratio	3.385	3.385
		38	Golgi	149.31				38	Golgi	134.078				38	Golgi	103.525						38	Golgi	131.488					38	Golgi	112.011					38	Golgi	161.708
			Cyto	18.4294					Cyto	18.0273					Cyto	24.5281							Cyto	19.4989						Cyto	40.11						Cyto	47.0426
			Ratio	8.1017	8.1017				Ratio	7.4375	7.4375				Ratio	4.2207	4.2207						Ratio	6.7433	6.7433					Ratio	2.7926	2.7926					Ratio	3.4375	3.4375
		39	Golgi	51.9086				39	Golgi	212.344				39	Golgi	76.7647						39	Golgi	170.624					39	Golgi	59.897					39	Golgi	196.989
			Cyto	8.0761					Cyto	26.2544					Cyto	17.6867							Cyto	36.8376						Cyto	19.929						Cyto	42.5032
			Ratio	6.4274	6.4274				Ratio	8.0879	8.0879				Ratio	4.3403	4.3403						Ratio	4.6318	4.6318					Ratio	3.0055	3.0055					Ratio	4.6347	4.6347
								40	Golgi	64.1789				40	Golgi	95.0054						40	Golgi	253.762					40	Golgi	164.071					40	Golgi	123.508
			AVG		6.14836				Cyto	23.6588					Cyto	29.0007							Cyto	77.6794						Cyto	54.0906						Cyto	22.3134
			SEM		0.467732				Ratio	2.7127	2.7127				Ratio	3.276	3.276						Ratio	3.2668	3.2668					Ratio	3.0333	3.0333					Ratio	5.5352	5.5352
								41	Golgi	18.8116				41	Golgi	66.5714													41	Golgi	138.605					41	Golgi	69.7377
									Cyto	6.097					Cyto	26.0345							AVG		5.49758					Cyto	43.1805						Cyto	16.7282
									Ratio	3.0854	3.0854				Ratio	2.5571	2.5571						SEM		0.261503					Ratio	3.2099	3.2099					Ratio	4.1689	4.1689
														42	Golgi	42.2162													42	Golgi	72.7586					42	Golgi	78.0268
									AVG		4.30434				Cyto	16.2661														Cyto	13.6885						Cyto	21.9999
									SEM		0.276166				Ratio	2.5953	2.5953													Ratio	5.3153	5.3153					Ratio	3.5467	3.5467
														43	Golgi	19.5													43	Golgi	66.1138					43	Golgi	86.6762
		One-way Anova tests performed in PRISM													Cyto	17.8532														Cyto	12.5173						Cyto	20.8818
		Tukey's multiple comparisons test	Mean Diff.	95.00% CI of diff.	Significant?	Summary	Adjusted P Value								Ratio	1.0922	1.0922													Ratio	5.2818	5.2818					Ratio	4.1508	4.1508
		WT-6 vs. WT-12	1.844	0.2715 to 3.417	Yes	*	0.0112							44	Golgi	33.8804													44	Golgi	108.058					44	Golgi	104.953
		WT-6 vs. WT-24	3.9	2.398 to 5.402	Yes	****	<0.0001								Cyto	22.2725														Cyto	13.4757						Cyto	23.6835
		WT-6 vs. 85-90-6	0.6508	-0.9313 to 2.233	No	ns	0.846								Ratio	1.5212	1.5212													Ratio	8.0187	8.0187					Ratio	4.4315	4.4315
		WT-6 vs. 85-90-12	0.6328	-0.8041 to 2.070	No	ns	0.8046							45	Golgi	5.1176													45	Golgi	98.8836					45	Golgi	161.708
		WT-6 vs. 85-90-24	1.501	0.05512 to 2.947	Yes	*	0.0367								Cyto	7.7344														Cyto	14.9224						Cyto	46.2706
		WT-12 vs. WT-24	2.056	0.5751 to 3.537	Yes	**	0.0012								Ratio	0.6617	0.6617													Ratio	6.6265	6.6265					Ratio	3.4948	3.4948
		WT-12 vs. 85-90-6	-1.193	-2.756 to 0.3692	No	ns	0.245							46	Golgi	64.4558													46	Golgi	46.2392					46	Golgi	196.989
		WT-12 vs. 85-90-12	-1.211	-2.626 to 0.2039	No	ns	0.1411								Cyto	19.116														Cyto	6.2754						Cyto	44.0404
		WT-12 vs. 85-90-24	-0.3429	-1.767 to 1.082	No	ns	0.9829								Ratio	3.3718	3.3718													Ratio	7.3684	7.3684					Ratio	4.4729	4.4729
		WT-24 vs. 85-90-6	-3.249	-4.741 to -1.758	Yes	****	<0.0001							47	Golgi	84.3297													47	Golgi	43.8315					47	Golgi	123.508
		WT-24 vs. 85-90-12	-3.268	-4.604 to -1.931	Yes	****	<0.0001								Cyto	20.5532														Cyto	7.8448						Cyto	21.3021
		WT-24 vs. 85-90-24	-2.399	-3.745 to -1.053	Yes	****	<0.0001								Ratio	4.103	4.103													Ratio	5.5873	5.5873					Ratio	5.7979	5.7979
		85-90-6 vs. 85-90-12	-0.01803	-1.444 to 1.408	No	ns	>0.9999							48	Golgi	76.9691													48	Golgi	100.517					48	Golgi	123.508
		85-90-6 vs. 85-90-24	0.8504	-0.5847 to 2.285	No	ns	0.5328								Cyto	23.9099														Cyto	14.5136						Cyto	12.2559
		85-90-12 vs. 85-90-24	0.8684	-0.4048 to 2.142	No	ns	0.3699								Ratio	3.2191	3.2191													Ratio	6.9257	6.9257					Ratio	10.0775	10.0775
														49	Golgi	27.6389													49	Golgi	105.143					49	Golgi	111.424
															Cyto	13.8623														Cyto	17.165						Cyto	19.986
															Ratio	1.9938	1.9938													Ratio	6.1254	6.1254					Ratio	5.5751	5.5751
														50	Golgi	114.707													50	Golgi	116.539					50	Golgi	110.23
															Cyto	47.1264														Cyto	20.5711						Cyto	18.7444
															Ratio	2.434	2.434													Ratio	5.6652	5.6652					Ratio	5.8807	5.8807
																													51	Golgi	79.3398					51	Golgi	111.424
															AVG		2.24808													Cyto	21.4279						Cyto	15.2531
															SEM		0.130197													Ratio	3.7026	3.7026					Ratio	7.305	7.305
																													52	Golgi	143.338					52	Golgi	166.695
																														Cyto	47.3079						Cyto	35.1826
																														Ratio	3.0299	3.0299					Ratio	4.738	4.738
																													53	Golgi	132.986					53	Golgi	146.977
																														Cyto	27.3094						Cyto	26.8236
																														Ratio	4.8696	4.8696					Ratio	5.4794	5.4794
																													54	Golgi	130					54	Golgi	82.4276
																														Cyto	31.2658						Cyto	12.1167
																														Ratio	4.1579	4.1579					Ratio	6.8028	6.8028
																													55	Golgi	125.558					55	Golgi	55.9767
																														Cyto	3.7055						Cyto	8.6425
																														Ratio	33.8844	33.8844					Ratio	6.4769	6.4769
																													56	Golgi	137.14					56	Golgi	82.3944
																														Cyto	38.1525						Cyto	10.3234
																														Ratio	3.5945	3.5945					Ratio	7.9813	7.9813
																													57	Golgi	128.184					57	Golgi	75.3994
																														Cyto	25.1092						Cyto	21.953
																														Ratio	5.1051	5.1051					Ratio	3.4346	3.4346
																													58	Golgi	109.237					58	Golgi	97.7924
																														Cyto	18.9969						Cyto	29.1821
																														Ratio	5.7502	5.7502					Ratio	3.3511	3.3511
																													59	Golgi	34.7301					59	Golgi	76.3194
																														Cyto	7.0149						Cyto	13.8384
																														Ratio	4.9509	4.9509					Ratio	5.515	5.515
																													60	Golgi	88.3194					60	Golgi	128.129
																														Cyto	14.4608						Cyto	15.9989
																														Ratio	6.1075	6.1075					Ratio	8.0086	8.0086
																													61	Golgi	146.187
																														Cyto	25.0036						AVG		4.6472
																														Ratio	5.8466	5.8466					SEM		0.225847
																													62	Golgi	161.649
																														Cyto	30.5087
																														Ratio	5.2984	5.2984
																														AVG		5.5156
																														SEM		0.498295

## Sheet: Fig 4a
				Scoring examples
			IFITM3 positive cells	Perinuclear VSV-G	Non-Perinuclear VSV-G				IFITM3 positive cells	Perinuclear VSV-G	Non-Perinuclear VSV-G				IFITM3 positive cells	Perinuclear VSV-G	Non-Perinuclear VSV-G				IFITM3 positive cells	Perinuclear VSV-G	Non-Perinuclear VSV-G
		picture n°						picture n°						picture n°						picture n°
	WT IFITM3 (0,1 microG)	1	2	0	2		WT IFITM3 (1 microG)	1	4	1	3		WT IFITM3 (2 microG)	1	2	2	0		WT IFITM3 (5 microG)	1	3	3	0
		2	1	0	1			2	2	0	2			2	3	3	0			2	2	2	0
		3	3	0	3			3	1	1	0			3	4	3	1			3	5	4	1
		4	3	1	2			4	2	2	0			4	4	2	2			4	3	2	1
		5	2	0	2			5	3	1	2			5	4	0	4			5	1	1	0
		6	6	0	6									6	4	1	3			6	5	5	0
		7	2	0	2			1	8	0	8			7	3	3	0			7	5	5	0
		8	1	0	1			2	10	0	10			8	4	3	1			8	8	2	6
		9	3	0	3			3	6	0	6			9	12	5	7			9	8	8	0
		10	3	1	2			4	2	0	2			10	2	0	2			10	10	6	4
		11	2	0	2			5	6	1	5			11	4	2	2			11	5	5	0
														12	5	4	1			12	4	4	0
		1	3	0	3			Total cells scored	44	6	38			13	3	2	1			13	5	4	1
		2	3	0	3			Proportions	100	13.6364	86.3636			14	6	4	2			14	8	4	4
		3	6	0	6									15	5	4	1			15	8	6	2
		4	3	0	3									16	4	2	2
		5	2	0	2															1	10	3	7
		6	5	0	5									1	8	3	5			2	13	12	1
														2	11	5	6			3	10	7	3
		Total cells scored	50	2	48									3	7	0	7			4	11	5	6
		Proportions	100	4	96									4	4	2	2			5	12	7	5
														5	10	7	3			6	8	3	5
														6	9	2	7
														7	16	9	7			Total cells scored	144	98	46
														8	12	5	7			Proportions	100	68.0556	31.9444
														9	12	5	7
														10	9	3	6
		One-way Anova tests performed in PRISM
		Dunnett's multiple comparisons test			Mean Diff.	95.00% CI of diff.	Significant?	Summary	Adjusted P Value					Total cells scored	167	81	86
		0,1 vs 1			-0.4824	-2,251 to 1,287	No	ns	0.8497					Proportions	100	48.503	51.497
		0,1 vs 2			-2.998	-4,382 to -1,613	Yes	****	<0,0001
		0,1 vs 5			-4.549	-5,997 to -3,101	Yes	****	<0,0001

## Sheet: Fig 4d
	GFP transfected cells					Normalized MFI Values (gfp)
		MFI
		CTL	WT	IFITM KO		WT	IFITM KO
	Exp 1	below threshold	4733	3829		1	0.809001
	Exp 2	below threshold	2540	2967		1	1.16811
	Exp 3	below threshold	3782	4334		1	1.14595
	Exp 4	below threshold	27795	31255		1	1.12448
	VSVg-transfected cells					Normalized MFI Values (plasma membrane VSVg)
		MFI
		CTL	WT	IFITM KO		WT	IFITM KO
	Exp 1	below threshold	1199	1792		1	1.49458
	Exp 2	below threshold	1703	2346		1	1.37757
	Exp 3	below threshold	4832	6556		1	1.35679
	Exp 4	below threshold	1658	2067		1	1.24668
		Calculated on Prism
					p value
		Student t test unpaired, two-tailed: GFP WT vs KO			0.4928
		Student t test unpaired, two-tailed: plasma membrane VSVg WT vs KO			0.0003

## Sheet: Fig 5a
			Perinuclear accumulation of VSVg-GFP in IFITM3 positive cells (except in control with no IFITM3)
			Number of cells per picture				Percentage cells with phenotype per picture
			Perinuclear	Non-Perinuclear			Perinuclear	Non-Perinuclear
	CTL	Picture n1	4	6			40	60
		Picture n2	0	5			0	100
		Picture n3	0	6			0	100
		Picture n4	0	8			0	100
		Picture n5	0	5			0	100
		Picture n6	0	2			0	100
		Picture n7	0	5			0	100
		Picture n8	2	4			33.3333	66.6667
		Picture n9	0	4			0	100
		Picture n10	0	7			0	100
		Tot cells scored	58			AVG	7.33333	92.6667
	ctl + Amphotericin B	Picture n1	0	11			0	100
		Picture n2	0	4			0	100
		Picture n3	1	2			33.3333	66.6667
		Picture n4	1	5			16.6667	83.3333
		Picture n5	0	2			0	100
		Picture n6	0	3			0	100
		Picture n7	0	2			0	100
		Picture n8	1	2			33.3333	66.6667
		Picture n9	0	2			0	100
		Picture n10	0	4			0	100
		Picture n11	0	4			0	100
		Tot cells scored	44			AVG	7.57576	92.4242
	WT low	Picture n1	1	4			20	80
		Picture n2	1	5			16.6667	83.3333
		Picture n3	1	4			20	80
		Picture n4	0	10			0	100
		Picture n5	1	3			25	75
		Picture n6	0	5			0	100
		Picture n7	2	3			40	60
		Tot cells scored	40			AVG	17.381	82.619
	WT low+ AmphoB	Picture n1	0	9			0	100
		Picture n2	0	12			0	100
		Picture n3	1	9			10	90
		Picture n4	2	16			11.1111	88.8889
		Picture n5	1	14			6.66667	93.3333
		Tot cells scored	64			AVG	5.55556	94.4444
	WT High	Picture n1	3	2			60	40
		Picture n2	4	3			57.1429	42.8571
		Picture n3	2	2			50	50
		Picture n4	2	1			66.6667	33.3333
		Picture n5	1	2			33.3333	66.6667
		Picture n6	1	1			50	50
		Picture n7	1	3			25	75
		Picture n8	4	2			66.6667	33.3333
		Picture n9	1	3			25	75
		Picture n10	2	3			40	60
		Tot cells scored	43			AVG	47.381	52.619
	WT High+ AmphoB	Picture n1	2	1			66.6667	33.3333
		Picture n2	2	6			25	75
		Picture n3	2	3			40	60
		Picture n4	0	5			0	100
		Picture n5	0	13			0	100
		Picture n6	0	2			0	100
		Picture n7	0	5			0	100
		Picture n8	1	3			25	75
		Picture n9	0	3			0	100
		Picture n10	0	2			0	100
		Tot cells scored	50			AVG	15.6667	84.3333
	85-90	Picture n1	3	1			75	25
		Picture n2	8	4			66.6667	33.3333
		Picture n3	12	1			92.3077	7.69231
		Picture n4	13	1			92.8571	7.14286
		Picture n5	13	2			86.6667	13.3333
		Picture n6	4	5			44.4444	55.5556
		Picture n7	5	2			71.4286	28.5714
		Picture n8	13	2			86.6667	13.3333
		Tot cells scored	89			AVG	77.0047	22.9953
	85-90 + Amphotericin B	Picture n1	1	8			11.1111	88.8889
		Picture n2	1	2			33.3333	66.6667
		Picture n3	0	4			0	100
		Picture n4	6	11			35.2941	64.7059
		Picture n5	5	8			38.4615	61.5385
		Picture n6	2	11			15.3846	84.6154
		Picture n7	1	9			10	90
		Picture n8	3	13			18.75	81.25
		Picture n9	1	2			33.3333	66.6667
		Picture n10	1	5			16.6667	83.3333
		Picture n11	3	4			42.8571	57.1429
		Tot cells scored	101			AVG	23.1993	76.8007
					p value
		Student t test unpaired, two-tailed: 85-90 +/- AmphoB			<0.0001
		Student t test unpaired, two-tailed: IFITM3 WT high +/- AmphoB			0.0022
		Student t test unpaired, two-tailed: IFITM3 WT low +/- AmphoB			0.8993

## Sheet: Fig 5b
			For asymmetrical distribution the left side of the cell was set as the side of the cell with higher protein accumulation levels
	85-90 IFITM3 mutant and VSV-G						85-90 IFITM3 mutant VSV-G and GS15 (0.2)						85-90 IFITM3 mutant VSV-G and GS15 (0.5)
			Side of nucleus		Normalized % at Left over total				Side of nucleus		Normalized % at Left over total				Side of nucleus		Normalized % at Left over total
			Left	Right					Left	Right					Left	Right
	Cell number	1	126.278	29.4748	81.0759		Cell number	1	170.4	113.352	60.0526		Cell number	1	31.633	22.212	58.7483
		2	139.612	51.0207	73.2361			2	97.0061	57.8915	62.626			2	42.4161	28.9764	59.4126
		3	133.49	34.1052	79.6502			3	147.632	145.317	50.3952			3	40	35	53.3333
		4	177.74	25.4957	87.4551			4	133.949	71.1261	65.317			4	43	32	57.3333
		5	93.5435	26.8397	77.7047			5	107.851	57.5276	65.2147			5	53	16	76.8116
		6	123.045	34.2388	78.2312			6	117.035	105.919	52.493			6	50.584	48.9275	50.8323
		7	96.3759	49.0142	66.2878			7	138.781	45.7903	75.191			7	60	28	68.1818
		8	173.692	122.295	58.6823			8	99.0581	53.656	64.865			8	84.525	61.3513	57.9429
		9	97.3708	26.5638	78.5663			9	141.369	124.942	53.0841			9	82	41	66.6667
		10	137.405	64.7053	67.9852			10	70.8036	39.1467	64.396			10	31.4016	25.2376	55.4415
		11	73.6377	13.5638	84.4455			11	106.101	64.7564	62.0991			11	28.6202	26.7775	51.6632
		12	153.139	79.283	65.8883			12	35	20	63.6364			12	47	35	57.3171
		13	128.822	85.7545	60.0355			13	135.099	22.0245	85.9826			13	48.8282	34.0247	58.9336
		14	112.859	39.9556	73.8536			14	108	36.45	74.7664			14	48.8	42.9	53.217
		15	86.9826	27.3452	76.0818			15	178.148	100.492	63.9347			15	64.3692	54.2523	54.2644
		16	66.6835	8.0828	89.1893			16	171.29	86.206	66.5215			16	60.8	55.81	52.1396
		17	33.2197	7.6048	81.372			17	140.631	26.4781	84.1552			17	116.109	84.9229	57.7566
		18	132.726	58.3387	69.4665			18	60	45	57.1429			18	135.504	92.6495	59.3915
		19	142.028	37.9207	78.927			19	171.789	121.683	58.5368			19	173.164	104.42	62.3825
		20	111.36	29.9	78.8334			20	145.144	121.724	54.388			20	18.7	13.73	57.6627
		21	128.019	10.5236	92.4041			21	57.6245	46.9755	55.0903
		22	88.1882	21.0416	80.7364			22	79.0051	40.0422	66.3645
		23	139.82	50.1696	73.5935			23	45.4007	21.2405	68.1271
		24	140.094	49.2468	73.9904			24	86.8394	61.0253	58.7289
		25	120.32	35.9	77.0196			25	6.8	4.62	59.5447
		26	110.083	24.5484	81.7662			26	51.9	28.9	64.2327
		27	126.037	29.1902	81.1952			27	47.3065	28.354	62.5247
		28	159.56	49	76.5056			28	31.4201	17.3441	64.4328
		29	78.5799	7.49767	91.2896			29	57.9	22.9	71.6584
								30	32.9	19.6	62.6667
								31	77.87	38	67.2046
		One-way Anova tests performed in PRISM
	Dunnett's multiple comparisons test			Mean Diff.	95.00% CI of diff.	Significant?	Summary	Adjusted P Value
	85-90 vs. GS15 85-90 0,2			13.04	8.162 to 17.92	Yes	****	<0.0001
	85-90 vs. GS15 85-90 0,5			18.61	13.12 to 24.10	Yes	****	<0.0001

## Sheet: Fig 6
		Cell number	Location and Signal		Ratio Golgi/Cytoplasm			Cell number	Location and Signal		Ratio Golgi/Cytoplasm			Cell number	Location and Signal		Ratio Golgi/Cytoplasm			Cell number	Location and Signal		Ratio Golgi/Cytoplasm			Cell number	Location and Signal		Ratio Golgi/Cytoplasm			Cell number	Location and Signal		Ratio Golgi/Cytoplasm			Cell number	Location and Signal		Ratio Golgi/Cytoplasm			Cell number	Location and Signal		Ratio Golgi/Cytoplasm
	S81A	1	Golgi	168.997			V82A	1	Golgi	252.708			K83A	1	Golgi	87.0324			S84A	1	Golgi	181.098			R85A	1	Golgi	149.764			D86A	1	Golgi	3434.69			R87A	1	Golgi	99.2874			K88A	1	Golgi	154.871			M89A
			Cyto	18.9504					Cyto	131.196					Cyto	13.8248					Cyto	25.0957					Cyto	30.3999					Cyto	1323.22					Cyto	37.8756					Cyto	35.496
			Ratio	8.9178	8.9178				Ratio	1.9262	1.9262				Ratio	6.2954	6.2954				Ratio	7.2163	7.2163				Ratio	4.9265	4.9265				Ratio	2.5957	2.5957				Ratio	2.6214	2.6214				Ratio	4.3631	4.3631
		2	Golgi	134.792				2	Golgi	251.42				2	Golgi	85.3267				2	Golgi	196.876				2	Golgi	70.4156				2	Golgi	2550.34				2	Golgi	82.6008				2	Golgi	135.12
			Cyto	16.2708					Cyto	113.702					Cyto	12.9344					Cyto	40.6347					Cyto	38.2492					Cyto	743.557					Cyto	16.2294					Cyto	26.1413
			Ratio	8.2843	8.2843				Ratio	2.2112	2.2112				Ratio	6.5969	6.5969				Ratio	4.845	4.845				Ratio	1.841	1.841				Ratio	3.4299	3.4299				Ratio	5.0896	5.0896				Ratio	5.1688	5.1688
		3	Golgi	181.987				3	Golgi	254.518				3	Golgi	238.923				3	Golgi	186.615				3	Golgi	179.152				3	Golgi	3953.89				3	Golgi	41.505				3	Golgi	162.248
			Cyto	37.5936					Cyto	145.666					Cyto	102.468					Cyto	18.7356					Cyto	17.9584					Cyto	1455.21					Cyto	28.0299					Cyto	52.8272
			Ratio	4.8409	4.8409				Ratio	1.7473	1.7473				Ratio	2.3317	2.3317				Ratio	9.9605	9.9605				Ratio	9.9759	9.9759				Ratio	2.7171	2.7171				Ratio	1.4807	1.4807				Ratio	3.0713	3.0713
		4	Golgi	151.146				4	Golgi	234.547				4	Golgi	181.688				4	Golgi	183.835				4	Golgi	94.9337				4	Golgi	100.001				4	Golgi	99.7022				4	Golgi	14.5521
			Cyto	42.7082					Cyto	119.217					Cyto	28.4779					Cyto	38.1084					Cyto	18.2291					Cyto	15.9092					Cyto	12.4934					Cyto	4.0196
			Ratio	3.539	3.539				Ratio	1.9674	1.9674				Ratio	6.38	6.38				Ratio	4.824	4.824				Ratio	5.2078	5.2078				Ratio	6.2857	6.2857				Ratio	7.9804	7.9804				Ratio	3.6203	3.6203
		5	Golgi	188.756				5	Golgi	159.684				5	Golgi	96.6512				5	Golgi	110.789				5	Golgi	230.311				5	Golgi	253.249				5	Golgi	44.4112				5	Golgi	190.06
			Cyto	33.3991					Cyto	49.5133					Cyto	22.8456					Cyto	23.2067					Cyto	31.8446					Cyto	32.6561					Cyto	31.1243					Cyto	28.5343
			Ratio	5.6515	5.6515				Ratio	3.2251	3.2251				Ratio	4.2306	4.2306				Ratio	4.774	4.774				Ratio	7.2323	7.2323				Ratio	7.755	7.755				Ratio	1.4269	1.4269				Ratio	6.6608	6.6608
		6	Golgi	232.584				6	Golgi	124.019				6	Golgi	127.421				6	Golgi	231.412				6	Golgi	63.2236				6	Golgi	90.415				6	Golgi	122.379				6	Golgi	114.172
			Cyto	34.159					Cyto	20.199					Cyto	16.2838					Cyto	49.072					Cyto	17.3066					Cyto	20.9442					Cyto	28.3757					Cyto	43.3957
			Ratio	6.8089	6.8089				Ratio	6.1399	6.1399				Ratio	7.825	7.825				Ratio	4.7158	4.7158				Ratio	3.6532	3.6532				Ratio	4.3169	4.3169				Ratio	4.3128	4.3128				Ratio	2.6309	2.6309
		7	Golgi	235.89				7	Golgi	253.915				7	Golgi	162.531				7	Golgi	189.99				7	Golgi	214.528				7	Golgi	157.061				7	Golgi	14.5436				7	Golgi	161.514
			Cyto	37.5448					Cyto	71.3409					Cyto	30.3					Cyto	53.0591					Cyto	50.4122					Cyto	14.6524					Cyto	16.7172					Cyto	47.7979
			Ratio	6.2829	6.2829				Ratio	3.5592	3.5592				Ratio	5.3641	5.3641				Ratio	3.5807	3.5807				Ratio	4.2555	4.2555				Ratio	10.7191	10.7191				Ratio	0.87	0.87				Ratio	3.3791	3.3791
		8	Golgi	246.174				8	Golgi	132.637				8	Golgi	202.167				8	Golgi	190.464				8	Golgi	146.909				8	Golgi	139.222				8	Golgi	61.5015				8	Golgi	85.5081
			Cyto	74.9148					Cyto	20.1931					Cyto	38.7112					Cyto	39.6731					Cyto	31.5214					Cyto	32.6678					Cyto	42.9655					Cyto	13.6815
			Ratio	3.2861	3.2861				Ratio	6.5684	6.5684				Ratio	5.2224	5.2224				Ratio	4.8008	4.8008				Ratio	4.6606	4.6606				Ratio	4.2618	4.2618				Ratio	1.4314	1.4314				Ratio	6.2499	6.2499
		9	Golgi	204.607				9	Golgi	153.069				9	Golgi	224.167				9	Golgi	112.441				9	Golgi	113.891				9	Golgi	49.8377				9	Golgi	162.298				9	Golgi	166.867
			Cyto	50.9096					Cyto	27.2212					Cyto	77.6774					Cyto	31.6537					Cyto	30.2017					Cyto	12.8835					Cyto	26.7959					Cyto	40.2041
			Ratio	4.019	4.019				Ratio	5.6232	5.6232				Ratio	2.8859	2.8859				Ratio	3.5522	3.5522				Ratio	3.771	3.771				Ratio	3.8683	3.8683				Ratio	6.0568	6.0568				Ratio	4.1505	4.1505
		10	Golgi	204.607				10	Golgi	139.329				10	Golgi	125.46				10	Golgi	181.222				10	Golgi	96.4097				10	Golgi	108.498				10	Golgi	118.258				10	Golgi	158.696
			Cyto	50.9096					Cyto	21.9052					Cyto	17.2999					Cyto	61.2662					Cyto	29.2695					Cyto	18.7869					Cyto	15.0182					Cyto	46.9212
			Ratio	4.019	4.019				Ratio	6.3606	6.3606				Ratio	7.252	7.252				Ratio	2.9579	2.9579				Ratio	3.2939	3.2939				Ratio	5.7752	5.7752				Ratio	7.8743	7.8743				Ratio	3.3822	3.3822
		11	Golgi	21.2082				11	Golgi	230.153				11	Golgi	145.17				11	Golgi	144.398				11	Golgi	120.16				11	Golgi	82.8649				11	Golgi	39.4346				11	Golgi	111.793
			Cyto	8.2211					Cyto	64.8704					Cyto	16.5479					Cyto	17.3343					Cyto	27.1393					Cyto	12.941					Cyto	32.5414					Cyto	18.2002
			Ratio	2.5797	2.5797				Ratio	3.5479	3.5479				Ratio	8.7727	8.7727				Ratio	8.3302	8.3302				Ratio	4.4275	4.4275				Ratio	6.4033	6.4033				Ratio	1.2118	1.2118				Ratio	6.1424	6.1424
		12	Golgi	51.6203				12	Golgi	203.577				12	Golgi	126.146				12	Golgi	202.836				12	Golgi	101.419				12	Golgi	239.945				12	Golgi	176.104				12	Golgi	36.0556
			Cyto	8.3265					Cyto	72.1419					Cyto	15.4843					Cyto	45.6603					Cyto	11.5633					Cyto	42.6045					Cyto	28.8647					Cyto	38.7811
			Ratio	6.1995	6.1995				Ratio	2.8219	2.8219				Ratio	8.1467	8.1467				Ratio	4.4423	4.4423				Ratio	8.7707	8.7707				Ratio	5.6319	5.6319				Ratio	6.101	6.101				Ratio	0.9297	0.9297
		13	Golgi	153.78				13	Golgi	167.093				13	Golgi	21.9106				13	Golgi	250.921				13	Golgi	85.1063				13	Golgi	200.704				13	Golgi	171.012				13	Golgi	9.3077
			Cyto	16.9323					Cyto	57.4547					Cyto	4.1431					Cyto	54.9692					Cyto	25.8667					Cyto	33.0759					Cyto	61.049					Cyto	35.1744
			Ratio	9.082	9.082				Ratio	2.9083	2.9083				Ratio	5.2884	5.2884				Ratio	4.5647	4.5647				Ratio	3.2902	3.2902				Ratio	6.068	6.068				Ratio	2.8012	2.8012				Ratio	0.2646	0.2646
		14	Golgi	134.78				14	Golgi	167.093				14	Golgi	30.065				14	Golgi	245.721				14	Golgi	87.1177				14	Golgi	206.901				14	Golgi	208.918				14	Golgi	205.837
			Cyto	18.3875					Cyto	57.4547					Cyto	7.2992					Cyto	48.8422					Cyto	18.8793					Cyto	32.3249					Cyto	36.5042					Cyto	32.2445
			Ratio	7.33	7.33				Ratio	2.9083	2.9083				Ratio	4.119	4.119				Ratio	5.0309	5.0309				Ratio	4.6145	4.6145				Ratio	6.4007	6.4007				Ratio	5.7231	5.7231				Ratio	6.3836	6.3836
		15	Golgi	91.8248				15	Golgi	202.81				15	Golgi	181.101				15	Golgi	225.351				15	Golgi	116.334				15	Golgi	208.108				15	Golgi	93.6912				15	Golgi	114.697
			Cyto	22.8849					Cyto	58.6522					Cyto	40.6387					Cyto	48.9997					Cyto	31.1139					Cyto	57.7333					Cyto	35.1825					Cyto	23.3562
			Ratio	4.0125	4.0125				Ratio	3.4578	3.4578				Ratio	4.4564	4.4564				Ratio	4.599	4.599				Ratio	3.739	3.739				Ratio	3.6046	3.6046				Ratio	2.663	2.663				Ratio	4.9108	4.9108
		16	Golgi	252.174				16	Golgi	198.023				16	Golgi	242.332				16	Golgi	152.1				16	Golgi	99.6319				16	Golgi	141.485				16	Golgi	36.4444				16	Golgi	11.1418
			Cyto	54.2969					Cyto	56.7151					Cyto	44.6984					Cyto	40.0539					Cyto	22.1493					Cyto	15.5652					Cyto	43.4668					Cyto	23.9106
			Ratio	4.6444	4.6444				Ratio	3.4915	3.4915				Ratio	5.4215	5.4215				Ratio	3.7974	3.7974				Ratio	4.4982	4.4982				Ratio	9.0898	9.0898				Ratio	0.8384	0.8384				Ratio	0.466	0.466
		17	Golgi	253.416				17	Golgi	177.239				17	Golgi	195.444				17	Golgi	105.566				17	Golgi	89.1337				17	Golgi	119.206				17	Golgi	182.611				17	Golgi	79.2963
			Cyto	82.5253					Cyto	42.7794					Cyto	55.1372					Cyto	35.535					Cyto	28.2392					Cyto	18.5912					Cyto	42.4631					Cyto	18.5969
			Ratio	3.0708	3.0708				Ratio	4.1431	4.1431				Ratio	3.5447	3.5447				Ratio	2.9708	2.9708				Ratio	3.1564	3.1564				Ratio	6.412	6.412				Ratio	4.3005	4.3005				Ratio	4.2639	4.2639
		18	Golgi	207.64				18	Golgi	177.239				18	Golgi	209.523				18	Golgi	163.305				18	Golgi	125.935				18	Golgi	180.828				18	Golgi	142.971				18	Golgi	125.536
			Cyto	55.7121					Cyto	42.7794					Cyto	69.2583					Cyto	35.8437					Cyto	15.7028					Cyto	34.2127					Cyto	37.7786					Cyto	28.8741
			Ratio	3.727	3.727				Ratio	4.1431	4.1431				Ratio	3.0252	3.0252				Ratio	4.556	4.556				Ratio	8.0199	8.0199				Ratio	5.2854	5.2854				Ratio	3.7844	3.7844				Ratio	4.3477	4.3477
		19	Golgi	101.143				19	Golgi	195.539				19	Golgi	185.066				19	Golgi	207.05				19	Golgi	47.8602				19	Golgi	157.779				19	Golgi	38.5				19	Golgi	63.1815
			Cyto	36.687					Cyto	45.8097					Cyto	70.9945					Cyto	73.1808					Cyto	15.3556					Cyto	24.3654					Cyto	28.2939					Cyto	12.6394
			Ratio	2.7569	2.7569				Ratio	4.2685	4.2685				Ratio	2.6068	2.6068				Ratio	2.8293	2.8293				Ratio	3.1168	3.1168				Ratio	6.4755	6.4755				Ratio	1.3607	1.3607				Ratio	4.9988	4.9988
		20	Golgi	186.609				20	Golgi	183.042				20	Golgi	132.478				20	Golgi	146.708				20	Golgi	120.219				20	Golgi	84.1304				20	Golgi	27				20	Golgi	85.7742
			Cyto	25.8881					Cyto	49.5675					Cyto	33.1591					Cyto	29.0648					Cyto	23.8014					Cyto	20.6615					Cyto	26.3477					Cyto	15.0971
			Ratio	7.2083	7.2083				Ratio	3.6928	3.6928				Ratio	3.9952	3.9952				Ratio	5.0476	5.0476				Ratio	5.0509	5.0509				Ratio	4.0719	4.0719				Ratio	1.0248	1.0248				Ratio	5.6815	5.6815
			AVG		5.31303				AVG		3.73558				AVG		5.18803				AVG		4.86977				AVG		4.87509				AVG		5.55839				AVG		3.44766				AVG		4.0533
			SEM		0.465326				SEM		0.325342				SEM		0.426316				SEM		0.397076				SEM		0.464222				SEM		0.462614				SEM		0.527813				SEM		0.423766
			One-way Anova tests performed in PRISM
		Dunnett's multiple comparisons test		Significant?	Summary	Adjusted P Value	Dunnett's multiple comparisons test	Significant?	Summary	Adjusted P Value
		WT vs. 85-90		Yes	****	<0,0001	85-90 vs. WT	Yes	****	<0,0001
		WT vs. S81A		Yes	****	<0,0001	85-90 vs. S81A	No	ns	0.9287
		WT vs. V82A		Yes	*	0.0166	85-90 vs. V82A	No	ns	0.5022
		WT vs. K83A		Yes	****	<0,0001	85-90 vs. K83A	No	ns	0.9925
		WT vs. S84A		Yes	****	<0,0001	85-90 vs. S84A	No	ns	0.9994
		WT vs. R85A		Yes	****	<0,0001	85-90 vs. R85A	No	ns	0.9994
		WT vs. D86A		Yes	****	<0,0001	85-90 vs. D86A	No	ns	0.5029
		WT vs. R87A		No	ns	0.1261	85-90 vs. R87A	No	ns	0.1091
		WT vs. K88A		Yes	**	0.001	85-90 vs. K88A	No	ns	0.9792
		WT vs. M89A		No	ns	0.9852	85-90 vs. M89A	Yes	***	0.0005
		WT vs. V90A		Yes	**	0.0036	85-90 vs. V90A	No	ns	0.8459
		WT vs. G91A		No	ns	0.9395	85-90 vs. G91A	Yes	**	0.0012
		WT vs. D92A		No	ns	0.9996	85-90 vs. D92A	Yes	****	<0,0001
		WT vs. V93A		No	ns	0.9993	85-90 vs. V93A	Yes	****	<0,0001
		WT vs. T94A		No	ns	0.4485	85-90 vs. T94A	Yes	*	0.0176
		WT vs. G95A		No	ns	0.1138	85-90 vs. G95A	No	ns	0.1214
		WT vs. A96G		Yes	****	<0,0001	85-90 vs. A96G	No	ns	0.9998
		WT vs. Q97A		Yes	*	0.0164	85-90 vs. Q97A	No	ns	0.5054
		WT vs. A98G		Yes	**	0.0069	85-90 vs. A98G	No	ns	0.7168
		WT vs. Y99A		No	ns	0.9351	85-90 vs. Y99A	Yes	**	0.0013
		WT vs. A100G		No	ns	0.9948	85-90 vs. A100G	Yes	***	0.0002
		WT vs. S101A		No	ns	0.3799	85-90 vs. S101A	Yes	*	0.024
		WT vs. T102A		No	ns	0.1985	85-90 vs. T102A	No	ns	0.0641
		WT vs. A103G		Yes	**	0.0086	85-90 vs. A103G	No	ns	0.6638
		WT vs. K104A		Yes	***	0.0004	85-90 vs. K104A	No	ns	0.9936
		WT vs. C105A		Yes	**	0.0016	85-90 vs. C105A	No	ns	0.9494
		WT vs. L106A		No	ns	0.0695	85-90 vs. L106A	No	ns	0.1929
		WT vs. N107A		Yes	***	0.0005	85-90 vs. N107A	No	ns	0.9929
[truncated: 75 more columns]

## Sheet: Fig 7b and 7c
		Cell number	Location and Signal		Ratio Golgi/Cytoplasm			Cell number	Location and Signal		Ratio Golgi/Cytoplasm			Cell number	Location and Signal		Ratio Golgi/Cytoplasm			Cell number	Location and Signal		Ratio Golgi/Cytoplasm			Cell number	Location and Signal		Ratio Golgi/Cytoplasm			Cell number	Location and Signal		Ratio Golgi/Cytoplasm
	IFITM1 WT	1	Golgi	2099			IFITM1 R64A	1	Golgi	15533			PRRT2 WT	1	Golgi	151.509			PRRT2 R291V	1	Golgi	65.8944			PRRT2 R295A	1	Golgi	48.1679			PRRT2 R295Q	1	Golgi	151.509
			Cyto	430648					Cyto	106851					Cyto	49.5779					Cyto	11.8642					Cyto	13.0995					Cyto	49.5779
			Ratio	0.00487405	0.00487405				Ratio	0.145371	0.145371				Ratio	3.056	3.056				Ratio	5.5541	5.5541				Ratio	3.6771	3.6771				Ratio	3.056	3.056
		2	Golgi	12984				2	Golgi	23868				2	Golgi	51.4859				2	Golgi	46.1883				2	Golgi	63.7222				2	Golgi	51.4859
			Cyto	626020					Cyto	141848					Cyto	38.1067					Cyto	39.0786					Cyto	33.0906					Cyto	38.1067
			Ratio	0.0207406	0.0207406				Ratio	0.168265	0.168265				Ratio	1.3511	1.3511				Ratio	1.1819	1.1819				Ratio	1.9257	1.9257				Ratio	1.3511	1.3511
		3	Golgi	1100				3	Golgi	115072				3	Golgi	108.323				3	Golgi	177.442				3	Golgi	72.3275				3	Golgi	108.323
			Cyto	56989					Cyto	677925					Cyto	45.3289					Cyto	52.7937					Cyto	42.2767					Cyto	45.3289
			Ratio	0.019302	0.019302				Ratio	0.169741	0.169741				Ratio	2.3897	2.3897				Ratio	3.361	3.361				Ratio	1.7108	1.7108				Ratio	2.3897	2.3897
		4	Golgi	1574				4	Golgi	383828				4	Golgi	161.372				4	Golgi	39.6402				4	Golgi	41.8484				4	Golgi	161.372
			Cyto	37984					Cyto	984600					Cyto	48.0523					Cyto	31.0305					Cyto	38.8651					Cyto	48.0523
			Ratio	0.0414385	0.0414385				Ratio	0.389831	0.389831				Ratio	3.3583	3.3583				Ratio	1.2775	1.2775				Ratio	1.0768	1.0768				Ratio	3.3583	3.3583
		5	Golgi	8565				5	Golgi	13.2457				5	Golgi	61.483				5	Golgi	198.591				5	Golgi	66.3103				5	Golgi	61.483
			Cyto	51843					Cyto	100.655					Cyto	27.416					Cyto	68.2197					Cyto	48.6831					Cyto	27.416
			Ratio	0.16521	0.16521				Ratio	0.131595	0.131595				Ratio	2.2426	2.2426				Ratio	2.9111	2.9111				Ratio	1.3621	1.3621				Ratio	2.2426	2.2426
		6	Golgi	3947				6	Golgi	9.8345				6	Golgi	30.5278				6	Golgi	45.8127				6	Golgi	65.5083				6	Golgi	30.5278
			Cyto	86770					Cyto	38.1008					Cyto	9.8732					Cyto	28.4147					Cyto	9.9339					Cyto	9.8732
			Ratio	0.0454881	0.0454881				Ratio	0.258118	0.258118				Ratio	3.092	3.092				Ratio	1.6123	1.6123				Ratio	6.5944	6.5944				Ratio	3.092	3.092
		7	Golgi	5725				7	Golgi	17.2063				7	Golgi	46.5429				7	Golgi	32.1397				7	Golgi	60.5438				7	Golgi	46.5429
			Cyto	129648					Cyto	116.197					Cyto	34.2416					Cyto	18.7448					Cyto	26.8008					Cyto	34.2416
			Ratio	0.044158	0.044158				Ratio	0.148078	0.148078				Ratio	1.3593	1.3593				Ratio	1.7146	1.7146				Ratio	2.259	2.259				Ratio	1.3593	1.3593
		8	Golgi	4289				8	Golgi	9.8961				8	Golgi	15.28				8	Golgi	133.124				8	Golgi	174.429				8	Golgi	15.28
			Cyto	31231					Cyto	33.4197					Cyto	53.0945					Cyto	90.975					Cyto	73.461					Cyto	53.0945
			Ratio	0.137331	0.137331				Ratio	0.296116	0.296116				Ratio	0.2878	0.2878				Ratio	1.4633	1.4633				Ratio	2.3744	2.3744				Ratio	0.2878	0.2878
		9	Golgi	20737				9	Golgi	14.5806				9	Golgi	113.351				9	Golgi	109.189				9	Golgi	118.836				9	Golgi	113.351
			Cyto	363810					Cyto	56.8664					Cyto	31.3048					Cyto	44.4427					Cyto	72.3525					Cyto	31.3048
			Ratio	0.0569995	0.0569995				Ratio	0.256401	0.256401				Ratio	3.6209	3.6209				Ratio	2.4568	2.4568				Ratio	1.6425	1.6425				Ratio	3.6209	3.6209
		10	Golgi	24676				10	Golgi	10.7932				10	Golgi	38.0287				10	Golgi	202.593				10	Golgi	75.1854				10	Golgi	38.0287
			Cyto	392650					Cyto	28.2166					Cyto	36.8941					Cyto	56.977					Cyto	30.4577					Cyto	36.8941
			Ratio	0.0628448	0.0628448				Ratio	0.382512	0.382512				Ratio	1.0308	1.0308				Ratio	3.5557	3.5557				Ratio	2.4685	2.4685				Ratio	1.0308	1.0308
		11	Golgi	24709				11	Golgi	13.5799				11	Golgi	39.25				11	Golgi	64.1655				11	Golgi	118.798				11	Golgi	39.25
			Cyto	589920					Cyto	70.2889					Cyto	16.4387					Cyto	20.2715					Cyto	28.7631					Cyto	16.4387
			Ratio	0.0418853	0.0418853				Ratio	0.193201	0.193201				Ratio	2.3877	2.3877				Ratio	3.1653	3.1653				Ratio	4.1302	4.1302				Ratio	2.3877	2.3877
		12	Golgi	15212				12	Golgi	6.3164				12	Golgi	28.1168				12	Golgi	54.4276				12	Golgi	89.8172				12	Golgi	28.1168
			Cyto	348410					Cyto	57.7078					Cyto	10.5613					Cyto	25.6708					Cyto	23.4204					Cyto	10.5613
			Ratio	0.0436612	0.0436612				Ratio	0.109455	0.109455				Ratio	2.6622	2.6622				Ratio	2.1202	2.1202				Ratio	3.835	3.835				Ratio	2.6622	2.6622
		13	Golgi	8933				13	Golgi	6.7176				13	Golgi	46.7836				13	Golgi	244.96				13	Golgi	17.7075				13	Golgi	46.7836
			Cyto	86141					Cyto	25.0024					Cyto	14.4267					Cyto	39.3762					Cyto	7.1965					Cyto	14.4267
			Ratio	0.103702	0.103702				Ratio	0.268678	0.268678				Ratio	3.2428	3.2428				Ratio	6.221	6.221				Ratio	2.4606	2.4606				Ratio	3.2428	3.2428
		14	Golgi	21934				14	Golgi	9.8823				14	Golgi	32.9733				14	Golgi	92.5386				14	Golgi	18.4643				14	Golgi	32.9733
			Cyto	104714					Cyto	47.6619					Cyto	11.5311					Cyto	32.8353					Cyto	12.9808					Cyto	11.5311
			Ratio	0.209466	0.209466				Ratio	0.207342	0.207342				Ratio	2.8595	2.8595				Ratio	2.8183	2.8183				Ratio	1.4224	1.4224				Ratio	2.8595	2.8595
		15	Golgi	2.2588				15	Golgi	4.3125				15	Golgi	29.3189				15	Golgi	17.8827				15	Golgi	21.8902				15	Golgi	29.3189
			Cyto	43.0648					Cyto	21.9508					Cyto	9.8021					Cyto	17.4285					Cyto	7.0424					Cyto	9.8021
			Ratio	0.0524512	0.0524512				Ratio	0.196462	0.196462				Ratio	2.9911	2.9911				Ratio	1.0261	1.0261				Ratio	3.1083	3.1083				Ratio	2.9911	2.9911
		16	Golgi	2.2567				16	Golgi	10.9581				16	Golgi	33.3889				16	Golgi	24.6557				16	Golgi	27.5382				16	Golgi	33.3889
			Cyto	12.3794					Cyto	28.9673					Cyto	11.3408					Cyto	19.8655					Cyto	8.1367					Cyto	11.3408
			Ratio	0.182295	0.182295				Ratio	0.378292	0.378292				Ratio	2.9441	2.9441				Ratio	1.2411	1.2411				Ratio	3.3844	3.3844				Ratio	2.9441	2.9441
		17	Golgi	0.4916				17	Golgi	12.566				17	Golgi	56.4432				17	Golgi	12.7428				17	Golgi	31.1761				17	Golgi	56.4432
			Cyto	3.1123					Cyto	106.448					Cyto	11.6467					Cyto	7.333					Cyto	6.0693					Cyto	11.6467
			Ratio	0.157954	0.157954				Ratio	0.118048	0.118048				Ratio	4.8463	4.8463				Ratio	1.7377	1.7377				Ratio	5.1367	5.1367				Ratio	4.8463	4.8463
		18	Golgi	0.4403				18	Golgi	3.7673				18	Golgi	104.343				18	Golgi	50.2408				18	Golgi	71.1719				18	Golgi	104.343
			Cyto	5.0598					Cyto	23.0157					Cyto	12.46					Cyto	9.1923					Cyto	6.0497					Cyto	12.46
			Ratio	0.0870192	0.0870192				Ratio	0.163684	0.163684				Ratio	8.3743	8.3743				Ratio	5.4655	5.4655				Ratio	11.7646	11.7646				Ratio	8.3743	8.3743
		19	Golgi	1.4741				19	Golgi	5.085				19	Golgi	19.3576				19	Golgi	13.1163				19	Golgi	14.069				19	Golgi	19.3576
			Cyto	35.0776					Cyto	17.572					Cyto	14.417					Cyto	9.6093					Cyto	3.0654					Cyto	14.417
			Ratio	0.042024	0.042024				Ratio	0.289381	0.289381				Ratio	1.3427	1.3427				Ratio	1.3649	1.3649				Ratio	4.5897	4.5897				Ratio	1.3427	1.3427
		20	Golgi	2.2111				20	Golgi	4.4082				20	Golgi	44.1624				20	Golgi	21.9973				20	Golgi	26.907				20	Golgi	44.1624
			Cyto	14.6631					Cyto	21.9431					Cyto	8.8155					Cyto	11.5311					Cyto	12.0432					Cyto	8.8155
			Ratio	0.150793	0.150793				Ratio	0.200892	0.200892				Ratio	5.0096	5.0096				Ratio	1.9077	1.9077				Ratio	2.2342	2.2342				Ratio	5.0096	5.0096
														21	Golgi	26.5845										21	Golgi	22.8571				21	Golgi	26.5845
			AVG		0.0834819				AVG		0.223573				Cyto	7.434					AVG		2.6078				Cyto	4.2981					Cyto	7.434
			SEM		0.0137487				SEM		0.0196785				Ratio	3.5761	3.5761				SEM		0.348452				Ratio	5.318	5.318				Ratio	3.5761	3.5761
														22	Golgi	14.04										22	Golgi	111.357				22	Golgi	14.04
															Cyto	9.2419											Cyto	8.4628					Cyto	9.2419
			Student t test WT. vs R64A IFITM1 (two tailed): p value												Ratio	1.5192	1.5192										Ratio	13.1584	13.1584				Ratio	1.5192	1.5192
														23	Golgi	54.6032										23	Golgi	26.701				23	Golgi	54.6032
															Cyto	6.9442											Cyto	7.3347					Cyto	6.9442
			<0.0001												Ratio	7.8631	7.8631										Ratio	3.6404	3.6404				Ratio	7.8631	7.8631
														24	Golgi	41.6217										24	Golgi	78.2179				24	Golgi	41.6217
															Cyto	9.1705											Cyto	8.1421					Cyto	9.1705
															Ratio	4.5386	4.5386										Ratio	9.6066	9.6066				Ratio	4.5386	4.5386
														25	Golgi	28.6005																25	Golgi	28.6005
															Cyto	10.441											AVG		4.12003				Cyto	10.441
															Ratio	2.7392	2.7392										SEM		0.656032				Ratio	2.7392	2.7392
															AVG		3.1474																AVG		3.1474
															SEM		0.378221																SEM		0.378221

[truncated: 5 more sheets: extended data Figure 2, extended data Figure 3, extended data Figure 4, extended data Figure 5 , extended data Figure 6b]
